# Supplementary material for: Optimization of Oligomer Chitosan/Polyvinylpyrrolidone Coating for Enhancing Antibacterial, Hemostatic Effects and Biocompatibility of Nanofibrous Wound Dressing
Source: MDPI journal article supplement (doi:10.3390/polym14173541), 2022-08-29
Supplement: s1 [file s1]

## **Supplementary Materials for**

### **OPTIMIZATION OF OLIGOMER CHITOSAN/ POLYVINYLPIRROLIDONE COATING FOR ENHANCING ANTIBACTERIAL, HEMOSTATIC EFFECTS AND BIOCOMPATIBILITY OF NANOFIBROUS WOUND DRESSING**

Vinh Khanh Doan, Chien Minh Tran, Trinh Thi-Phuong Ho, Linh Kim-Khanh Nguyen, Yen  
Ngoc Nguyen, Ngan Tuan Tang, Tin Dai Luong, Nhi Ngoc-Thao Dang, Nam Minh-Phuong  
Tran, Thanh Binh Vu, Hoai Thi-Thu Nguyen, Quyen Thuc Huynh, Hien Quoc Nguyen,  
Chien Mau Dang, Thang Bach Phan, Hanh Thi-Kieu Ta, Viet Hung Dang, Thanh Dinh Le,  
Toi Van Vo, Hiep Thi Nguyen\*

\*Corresponding author: [nthiep@hcmiu.edu.vn](mailto:nthiep@hcmiu.edu.vn)

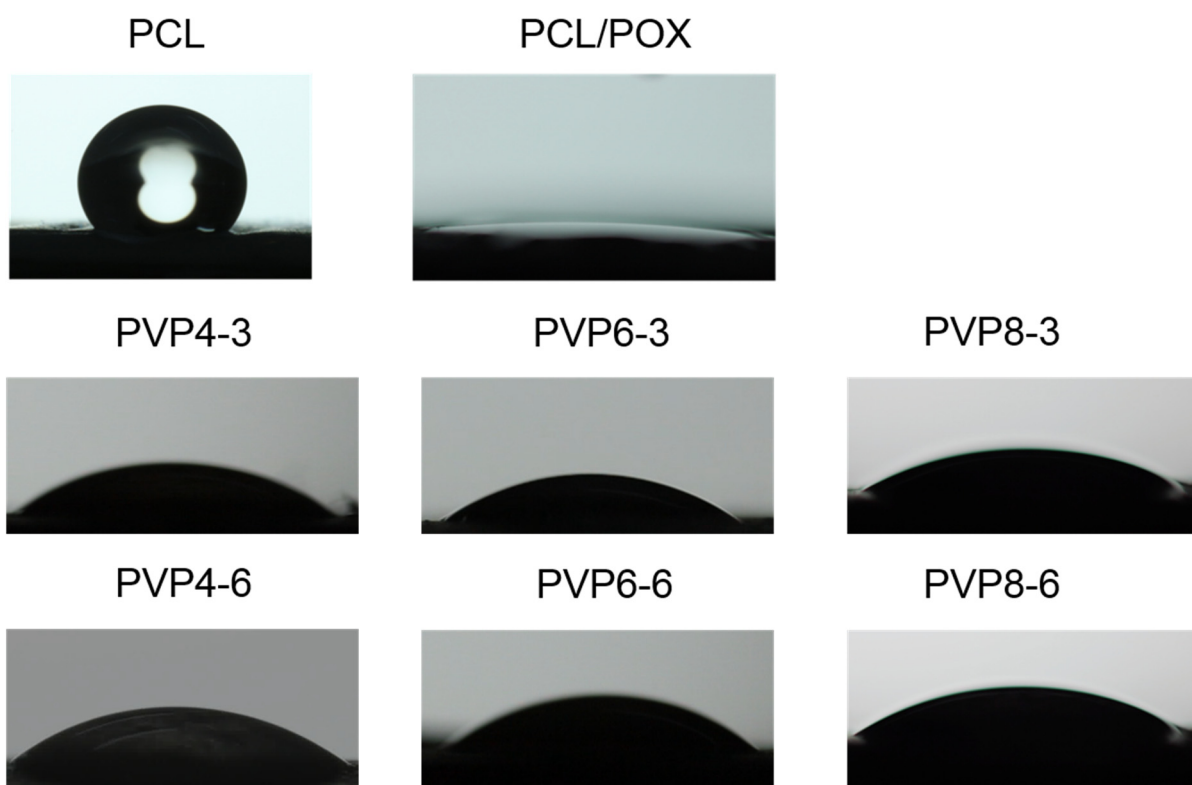

**Figure S1. Images of water droplets on PCL, PCL/POX, and PVP/COS surfaces after 0'12''s**

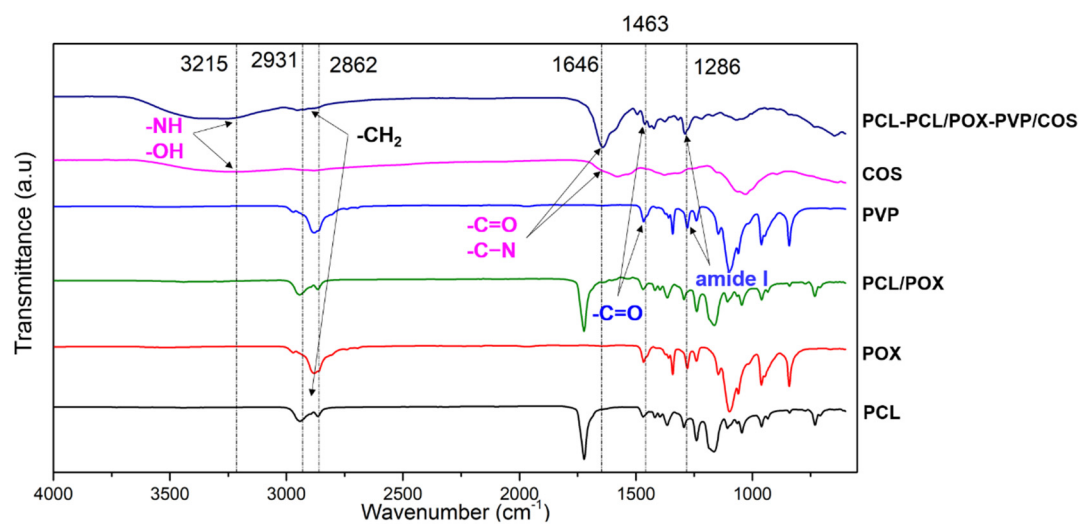

**Figure S2. FT-IR spectra of PCL, POX, COS, PVP, and PCL-PCL/POX-PVP/COS membranes**

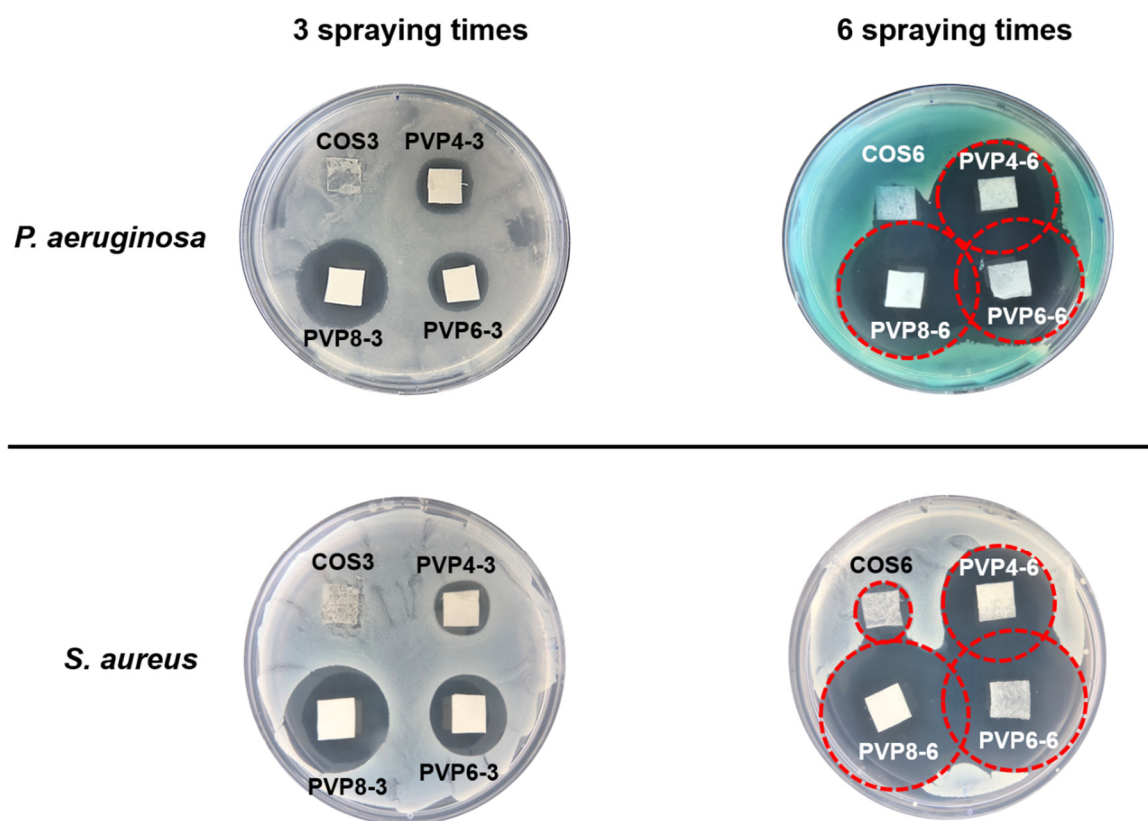

**Figure S3:** Antibacterial properties of PCL-PCL/POX-PVP/COS membranes with varying PVP concentration and spraying times against *S. aureus* and *P. aeruginosa* by agar disk diffusion test.

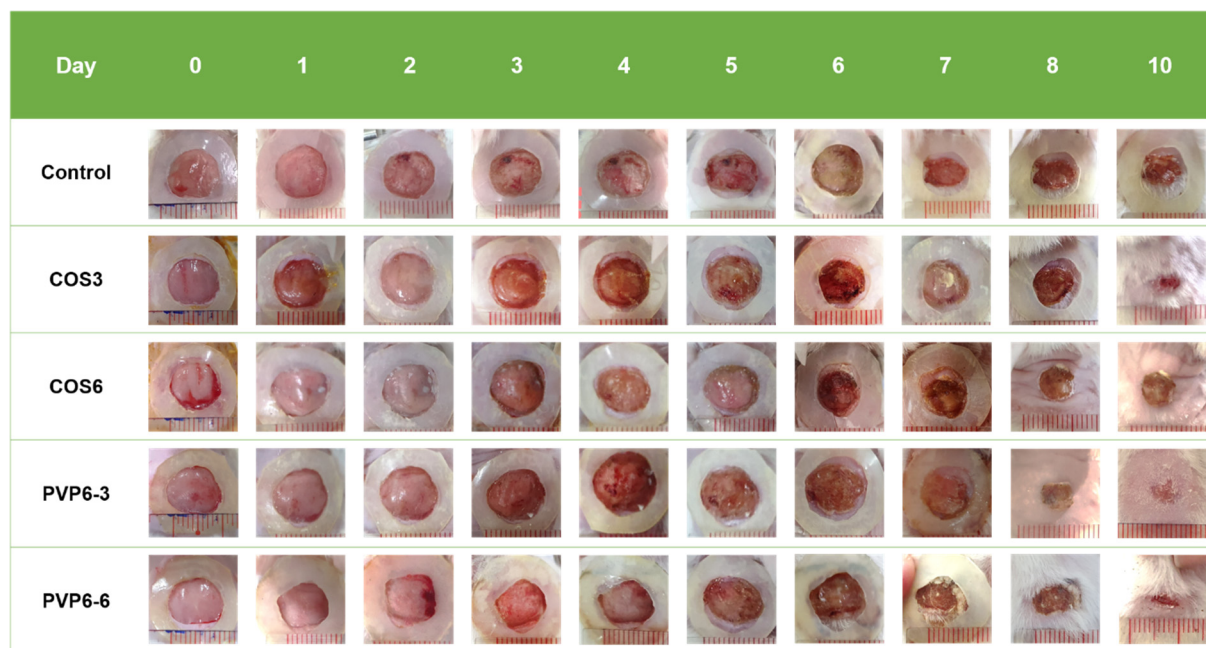

**Figure S4. Photographs of surgery sites treated with COS3, COS6, PVP6-3, and PVP6-6 from day 0 to 10.**

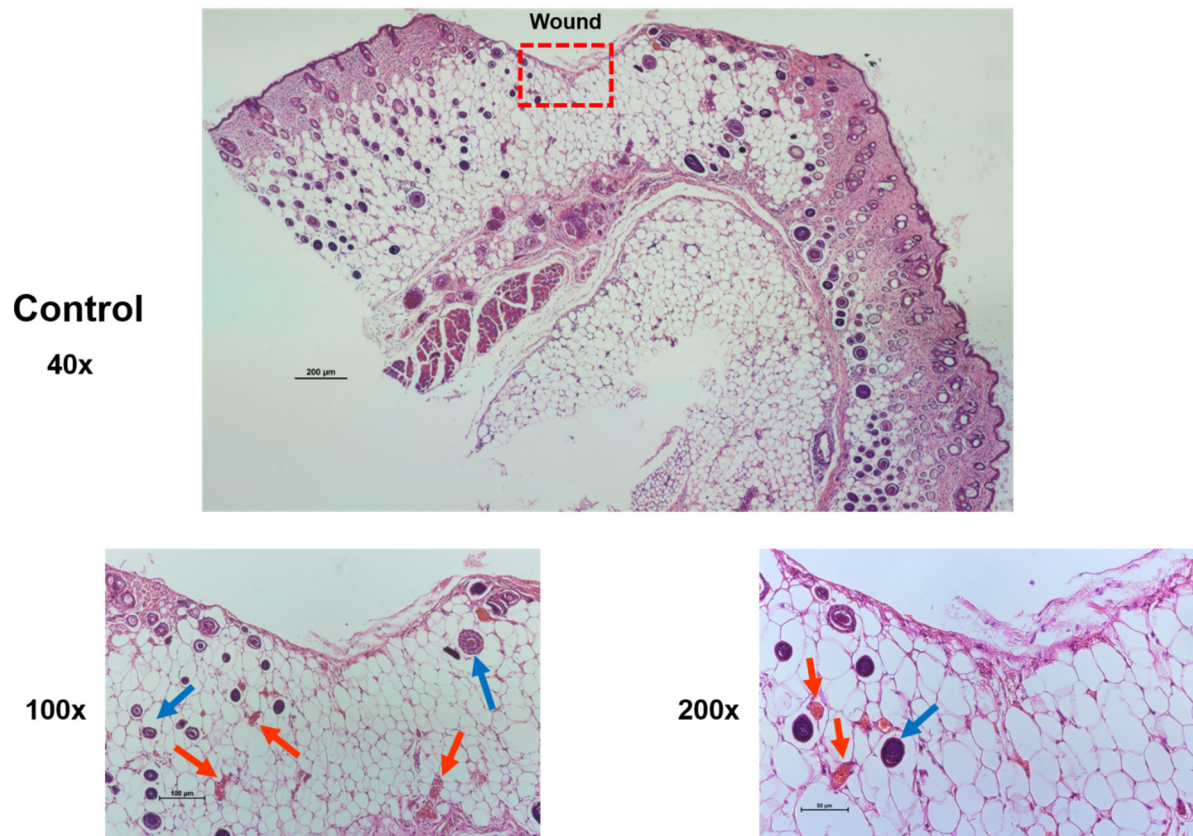

**Figure S5. Histological examination of tissues from mice of the control group.**

Scale bar: 40× – 200 μm, 100× – 100 μm, and 200× – 50 μm. Ep: Epidermis, GT: Granulation tissue. Red arrows indicate blood vessels and erythrocytes. Blue arrows indicate hair follicles. Recovered area is not showed since the wound had not healed.



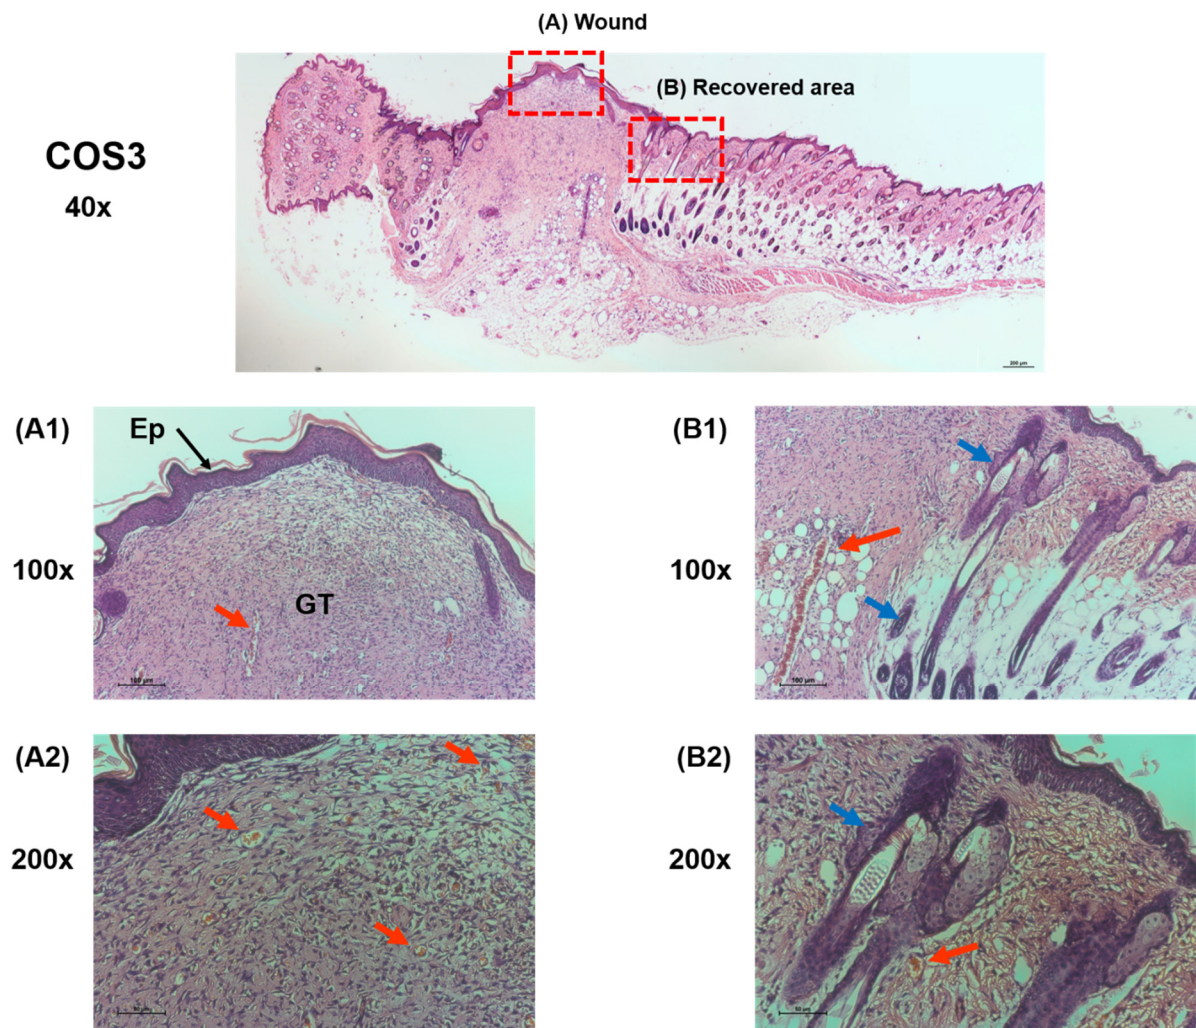

**Figure S6. Histological examination of tissues from mice treated with COS3 sample.**

(A) Wound area (B) Recovered area. Scale bar: 40× – 200  $\mu\text{m}$ , 100× – 100  $\mu\text{m}$ , and 200× – 200  $\mu\text{m}$ . Ep: Epidermis, GT: Granulation tissue. Red arrows indicate blood vessels and erythrocytes. Blue arrows indicate hair follicles.

**COS6**  
40x

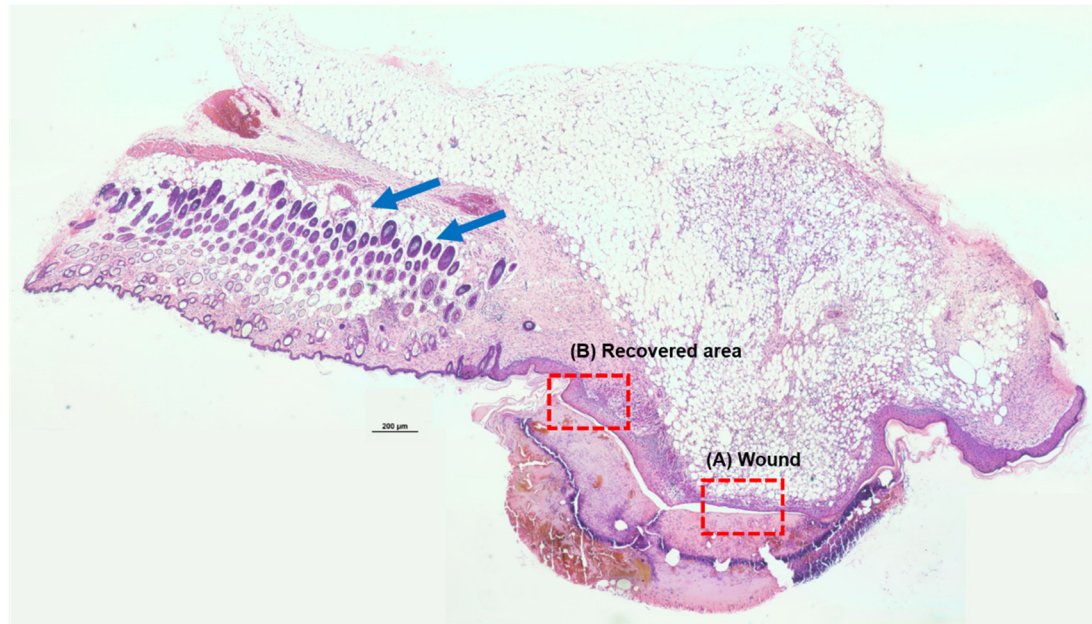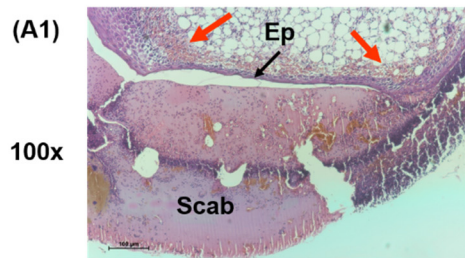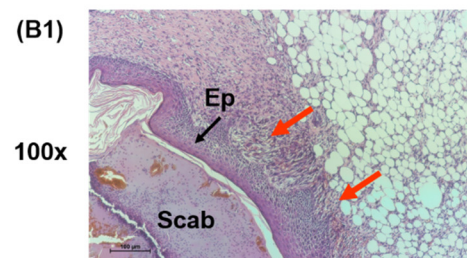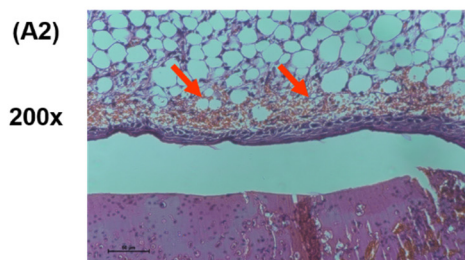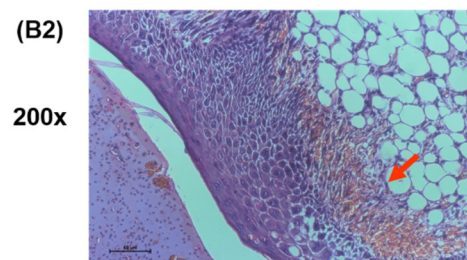

**Figure S7. Histological examination of tissues from mice treated with COS6 sample.**

(A) Wound area (B) Recovered area. Scale bar: 40× – 200 μm, 100× – 100 μm, and 200× – 200 μm. Ep: Epidermis, GT: Granulation tissue. Red arrows indicate blood vessels and erythrocytes. Blue arrows indicate hair follicles.



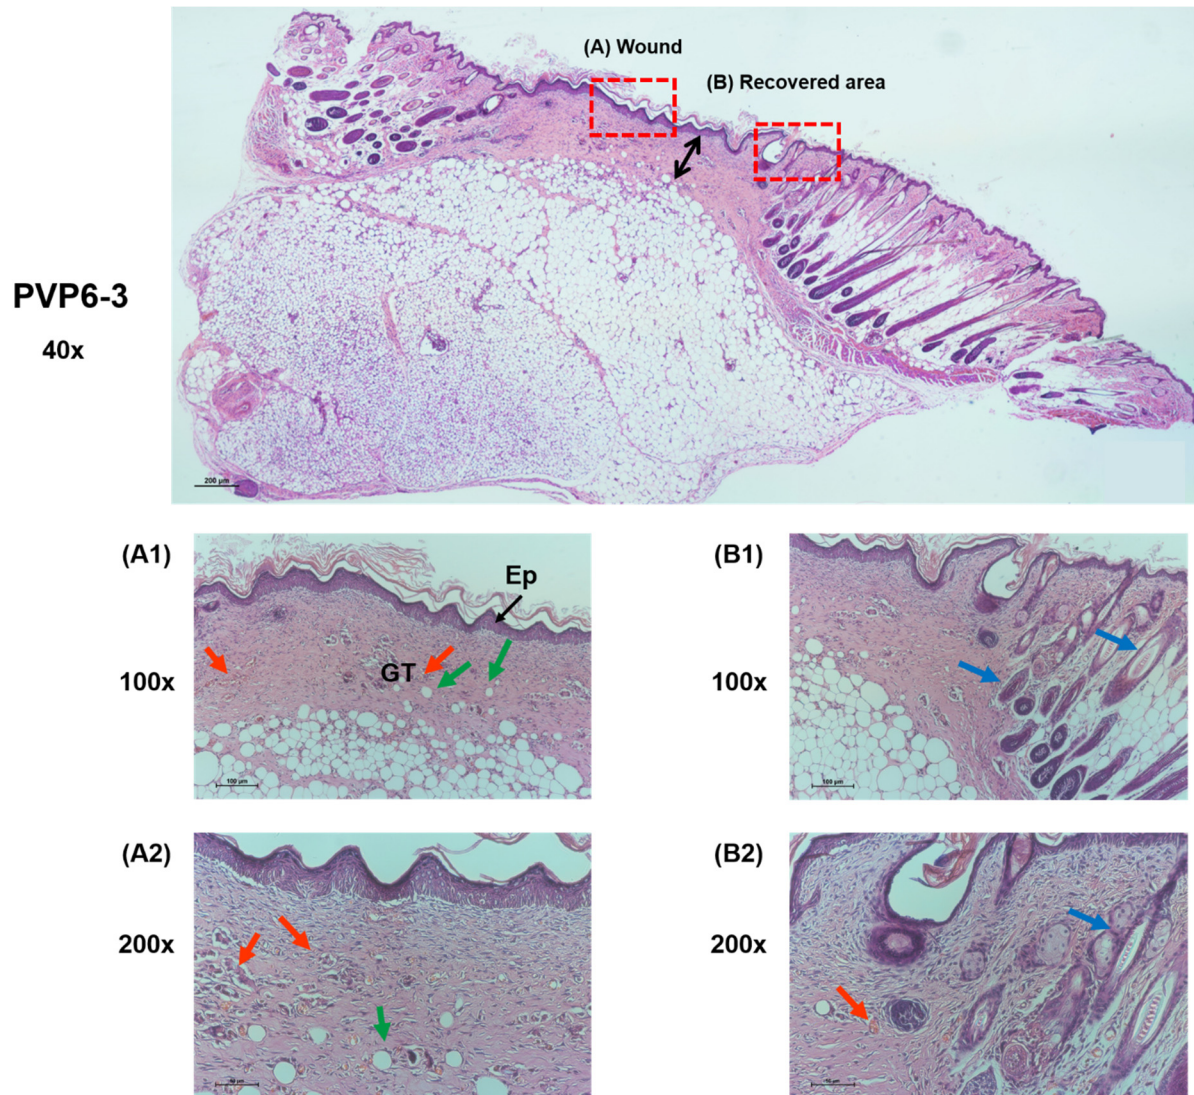

**Figure S8. Histological examination of tissues from mice treated with PVP6-3 sample.**

(A) Wound area (B) Recovered area. Scale bar: 40× – 200  $\mu\text{m}$ , 100× – 100  $\mu\text{m}$ , and 200 – 200  $\mu\text{m}$ . Ep: Epidermis, GT: Granulation tissue. Double-headed arrow indicates a thick dermis layer. Red arrows indicate blood vessels and erythrocytes. Blue arrows indicate hair follicles. Green arrows indicate adipocytes.

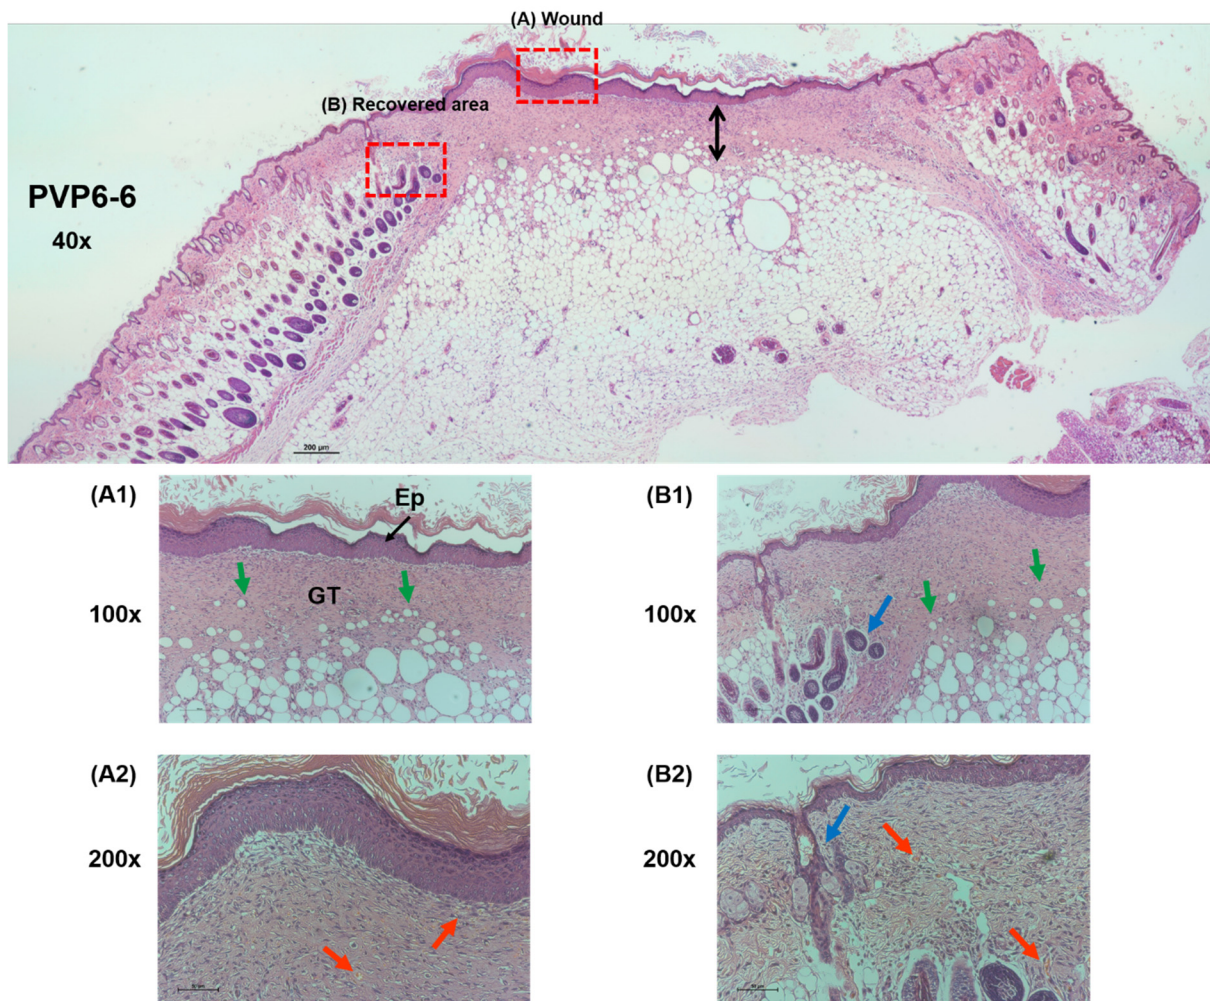

**Figure S9: Histological examination of tissues from mice treated with PVP6-6 sample.**

(A) Wound area (B) Recovered area. Scale bar: 40 $\times$  – 200  $\mu$ m, 100 $\times$  – 100  $\mu$ m, and 200 $\times$  – 200  $\mu$ m. Ep: Epidermis, GT: Granulation tissue. Double-headed arrow indicates a thick dermis layer. Red arrows indicate blood vessels and erythrocytes. Blue arrows indicate hair follicles. Green arrows indicate adipocytes.
